# Supplementary material
Source: PubMed Central journal article supplement (PMC3807221)
Supplement: embor2013132df3.pdf [file embor2013132df3.pdf]

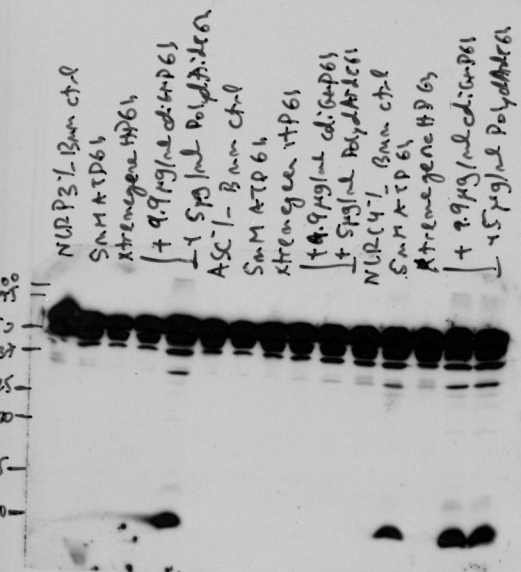

AS

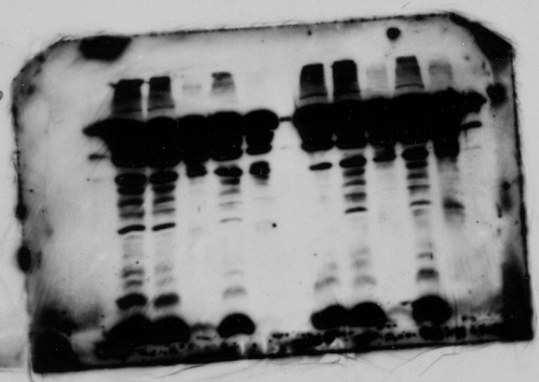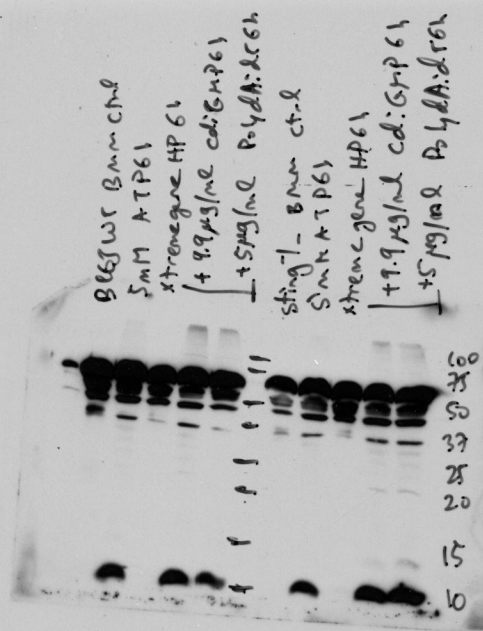

B6J wt Bam ctcl  
 Sm AT P6h  
 xtre gene HP6  
 + 9.9 μg/ml  
 + 5 μg/ml

stry L Bam ctcl  
 Sm AT P6h  
 xtre gene HP6h  
 + 9.9 μg/ml cdG c1  
 + 5 μg/ml dA:dT6h

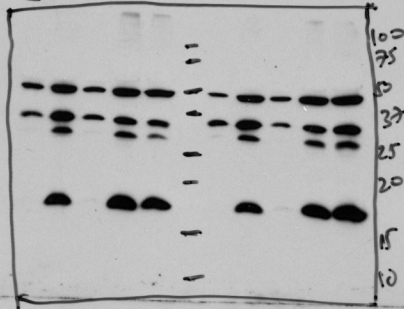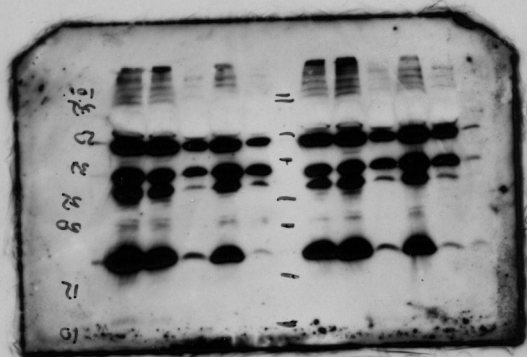

MOP27 Bam ctcl  
 Sm AT P6h  
 xtre gene HP6h  
 + 9.9 μg/ml cdG c1  
 + 5 μg/ml dA:dT6h  
 ASCT Bam ctcl  
 Sm AT P6h  
 xtre gene HP6h  
 + 9.9 μg/ml cdG c1  
 + 5 μg/ml dA:dT6h  
 MOP27 Bam ctcl  
 Sm AT P6h  
 xtre gene HP6h  
 + 9.9 μg/ml cdG c1  
 + 5 μg/ml dA:dT6h

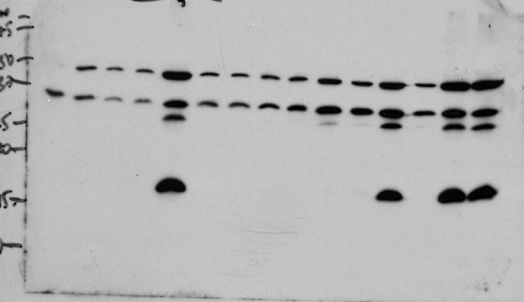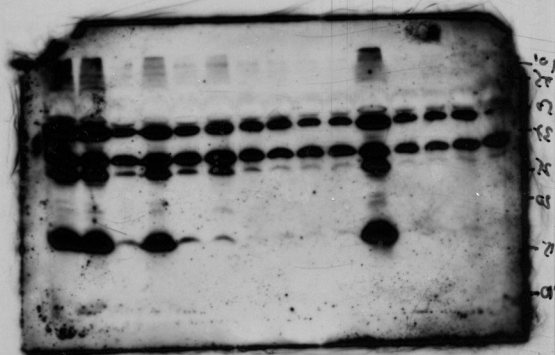

A3  
 x mut 546 1:1000  
 2° x rest -HP6 1:2800

STRATAGENE

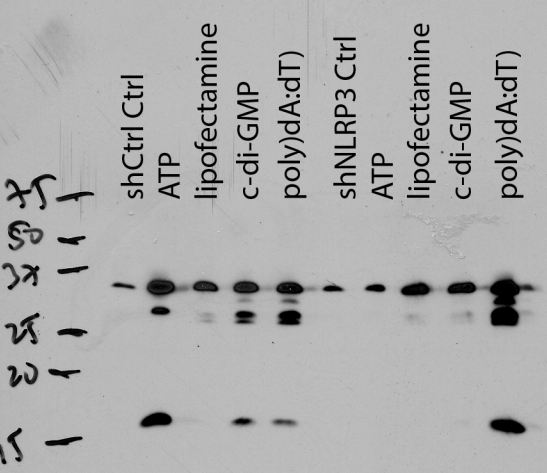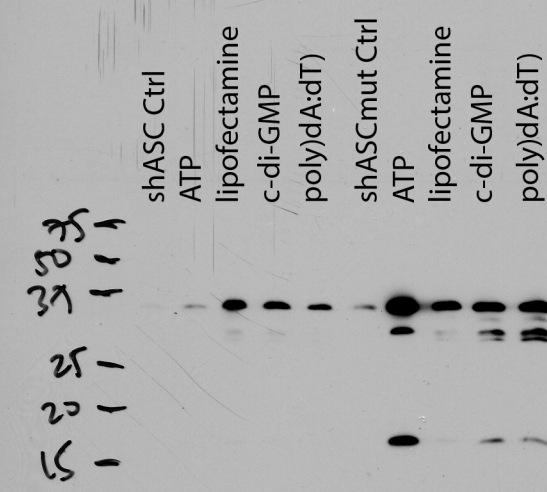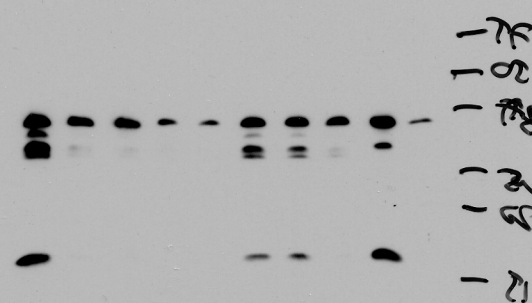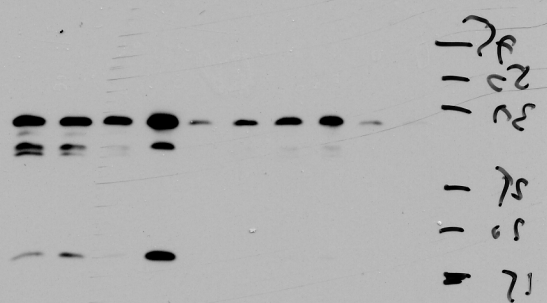

AS280  
 α-mu ICP 1:1000  
 20 μg/ml - ATP 1:500

PMA diff. THP-1 (1000x)

THP-1 sh. ctrl ct. 2  
 SM ATP 6L  
 2µl left-6L  
 | + 3.3µg cd66L  
 | + Sp9/2 Poly AT6L

THP-1 sh. NUP2 ct. 2  
 SM ATP 6L  
 2µl left-6L  
 | + 3.3µg cd66L  
 | + Sp9/2 Poly AT6L

15 |  
 20 |  
 25 |  
 30 |  
 35 |

THP-1 sh. ASC ct. 2  
 SM ATP 6L  
 2µl left-6L  
 | + 3.3µg cd66L  
 | + Sp9/2 Poly AT6L

THP-1 sh. ASC <sup>ind</sup> ctrl  
 SM ATP 6L  
 2µl left-6L  
 | + 3.3µg cd66L  
 | + Sp9/2 Poly AT6L

15 |  
 20 |  
 25 |  
 30 |  
 35 |  
 40 |

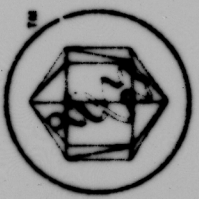

AS280 03.13.12  
 α-hu Casp1 -p20  
 2° α-rabbit-ATP 1:500
